# Supplementary material for: Health status and needs of cancer survivors attending the Sydney Survivorship Centre clinics and programmes: a protocol for longitudinal evaluation of the centre’s services
Source: PubMed Central journal article supplement — BMJ Open. 2017 May 9;7(5):e014803. doi: 10.1136/bmjopen-2016-014803 (PMC5623504; doi:10.1136/bmjopen-2016-014803), 2017-05-09
Supplement: bmjopen-2016-014803supp001.pdf [file bmjopen-2016-014803supp001.pdf]

**Appendix Table 1 - Schedule of assessments for patients attending the Sydney Survivorship “Weight Management Course”**

| <b>Assessment</b>                                                                                                                                                                                                                                                                            | <b>Baseline</b> | <b>3 Month</b> | <b>6 Month</b> | <b>12 Month</b> |
|----------------------------------------------------------------------------------------------------------------------------------------------------------------------------------------------------------------------------------------------------------------------------------------------|-----------------|----------------|----------------|-----------------|
| Baseline demographics and disease characteristics, weight history                                                                                                                                                                                                                            | X               |                |                |                 |
| <b>Clinical examination</b><br>(accredited exercise physiologist, dietitian, physician)                                                                                                                                                                                                      | X               | X              | X              | X               |
| <b>Body Composition</b><br>Bioimpedance analysis, skinfold measures, girth measures, BMI                                                                                                                                                                                                     | X               | X              |                |                 |
| DEXA scan (where appropriate)                                                                                                                                                                                                                                                                | X               |                |                | X               |
| <b>Fasting blood tests</b><br>FBC, EUC, LFT, glucose, lipids, iron studies, sex hormones, vitamin D, vitamin B12, TSH, IGF-1, CRP, albumin<br><br>Other bloods as appropriate when ordered as standard of care                                                                               | X               | X              | X              | X               |
| <b>Physical Function</b><br>6MWT and/or<br>Graded Sub-maximal Exercise Test;<br>Maximal 1-RM leg press; Hand grip dynamometry                                                                                                                                                                | X               | X              | X              | X               |
| <b>Nutritional Status</b><br>3-day weighed food diary                                                                                                                                                                                                                                        | X               | X              | X              | X               |
| <b>Patient Reported Outcomes</b><br>• IPAQ-sf <sup>1</sup><br>• EORTC-QLQ-C30 <sup>2</sup><br>• FACT-F 13-item subscale <sup>3</sup><br>• Patient’s Disease and Treatment Assessment Form <sup>4</sup><br>• Distress Thermometer <sup>5</sup><br>• Hunger Visual Analogue Scale <sup>6</sup> | X               | X              | X              | X               |
| <b>Physical Activity Behaviour</b><br>7-day Actigraph GT1M accelerometers                                                                                                                                                                                                                    | X               |                | X              | X               |
| Participant program evaluation; semi-structured interviews                                                                                                                                                                                                                                   |                 |                | X              |                 |
| Adverse Events (CTCAE V4) <sup>7</sup>                                                                                                                                                                                                                                                       |                 | X              | X              | X               |

BMI= Body mass index

EORTC-QLQC30 = The European Organisation for Research and Treatment of Cancer

FBC = full blood count; EUC = electrolytes, urea, creatinine; LFT = liver function tests ; TSH = Thyroid stimulating hormone; IGF-1 = Insulin-like growth factor -1; CRP = C-reactive protein  
6MWT= six-minute walk test; 1-RM=one repetition maximum  
IPAQ-sf=International Physical Activity Questionnaire – short form  
EORTC QLQ-C30= The European Organisation for Research and Treatment of Cancer Quality of Life Questionnaire  
FACT-F = Functional Assessment of Cancer Therapy (F= Fatigue)  
CTCAE= common terminology criteria for adverse event

## References:

1. Brown WJ, Trost SG, Bauman A, et al: Test-retest reliability of four physical activity measures used in population surveys. *J Sci Med Sport* 7:11, 2004
2. Groenvold M, Klee MC, Sprangers MAG, et al: Validation of the EORTC QLQ-C30 Quality of Life Questionnaire through combined qualitative and quantitative assessment of patient-observer agreement. *Journal of Clinical Epidemiology* 50:441-450, 1997
3. Yellen SB, Cella D, Webster K, et al: Measuring fatigue and other anemia-related symptoms with the functional assessment of cancer therapy (FACT) measurement system. *J Pain and Symptom Management* 13, 1997
4. Stockler MR, O'Connell R, Nowak AK, et al: Effect of sertraline on symptoms and survival in patients with advanced cancer, but without major depression: a placebo-controlled double-blind randomised trial. *Lancet Oncol* 8:603-12, 2007
5. Tuinman MA, Gazendam-Donofrio SM, Hoekstra-Weebers JE: Screening and referral for psychosocial distress in oncologic practice: use of the Distress Thermometer. *Cancer* 113:870-8, 2008
6. Caudwell P, Gibbons C, Hopkins M, et al: The influence of physical activity on appetite control: an experimental system to understand the relationship between exercise-induced energy expenditure and energy intake. *Proc Nutr Soc* 70:171-80, 2011
7. Institute NC: Common Terminology Criteria for Adverse Events (CTCAE) Version 4.0, 2009
